# Supplementary material for: Immuno-virological response and associated factors amongst HIV-1 vertically infected adolescents in Yaoundé-Cameroon
Source: PubMed Central journal article supplement (PMC5675438; doi:10.1371/journal.pone.0187566), 2017-11-07
Supplement: pone.0187566.s001.pdf [file pone.0187566.s001.pdf]

# S1 FILE

## QUESTIONNAIRE FOR ASSESSMENT OF IMMUNO-VIROLOGICAL RESPONSE ADOLESCENTS DATA COLLECTION SHEET

### Identification

Name:

Telephone N°:

Surname:

Identification code N°:

### I) Socio-demographic features

Sex: Male

Female

Age: \_\_\_\_\_ years

#### Parents' survival status:

- Orphan of father: 1
- Orphan of mother: 2
- Orphan of both parents: 3
- Non-orphan: 4

### II) Anthropometric data

Weight: \_\_\_\_\_ kg

Height : \_\_\_\_\_ metre

### III) Biomedical data

Age at ARV treatment initiation: \_\_\_\_\_ years ; ARV regimen: \_\_\_\_\_

Change of treatment regimen during monitoring: \_\_\_\_\_ Date \_\_\_\_\_

Number of viral load tests performed: \_\_\_\_\_ Number of CD4 tests performed: \_\_\_\_\_

Current viral load: \_\_\_\_\_ Current CD4 count: \_\_\_\_\_

Sustained viral suppression: YES (1); NO (2)

WHO clinical stage: I \_\_\_; II \_\_\_; III \_\_\_; IV \_\_\_

| History of immunological and virological parameters | Date           | CD4 count (cell/mm <sup>3</sup> ) | CD4 count (%) | Viral load (absolute value) | Viral load (logarithm) |
|-----------------------------------------------------|----------------|-----------------------------------|---------------|-----------------------------|------------------------|
|                                                     | __ / __ / ____ |                                   |               |                             |                        |
|                                                     | __ / __ / ____ |                                   |               |                             |                        |
|                                                     | __ / __ / ____ |                                   |               |                             |                        |
|                                                     | __ / __ / ____ |                                   |               |                             |                        |
|                                                     | __ / __ / ____ |                                   |               |                             |                        |
|                                                     | __ / __ / ____ |                                   |               |                             |                        |
|                                                     | __ / __ / ____ |                                   |               |                             |                        |
|                                                     | __ / __ / ____ |                                   |               |                             |                        |

### Adherence to antiretroviral treatment during the last 14 days:

| Statements                                                  | Yes | No |
|-------------------------------------------------------------|-----|----|
| Have you ever missed your dosage during these last 14 days? |     |    |

## FICHE DE COLLECTE DES DONNEES

### Identification

Nom : \_\_\_\_\_ N° de téléphone : \_\_\_\_\_  
Prénom : \_\_\_\_\_ N° d'anonymat : \_\_\_\_\_

### I) Données sociodémographiques

Sexe : Masculin  Féminin

Âge : \_\_\_\_\_ ans

#### État de survie des parents :

- Orphelin de père : 1
- Orphelin de mère : 2
- Orphelin des deux parents : 3
- Non orphelin : 4

### II) Données anthropométriques

Poids : \_\_\_\_\_ kg      Taille : \_\_\_\_\_ mètre

### III) Données biomédicales

Age à l'initiation du traitement ARV: \_\_\_\_\_ ans ; Protocole ARV : \_\_\_\_\_

Changement de protocole au cours du suivi : \_\_\_\_\_ Date \_\_\_\_\_

Nombre de charge virale : \_\_\_\_\_ Nombre de CD4 : \_\_\_\_\_

Charge Virale actuelle : \_\_\_\_\_ Taux de CD4 actuel : \_\_\_\_\_

Suppression virale permanente : OUI (1);      NON (2)

Stade clinique OMS: I \_\_\_\_; II \_\_\_\_; III \_\_\_\_; IV \_\_\_\_

| <b>Historique des paramètres immunologiques et virologiques</b> | Date           | CD4 (cell/mm <sup>3</sup> ) | CD4 (%) | Charge virale (valeur absolue) | Charge virale (logarithme) |
|-----------------------------------------------------------------|----------------|-----------------------------|---------|--------------------------------|----------------------------|
|                                                                 | __ / __ / ____ |                             |         |                                |                            |
|                                                                 | __ / __ / ____ |                             |         |                                |                            |
|                                                                 | __ / __ / ____ |                             |         |                                |                            |
|                                                                 | __ / __ / ____ |                             |         |                                |                            |
|                                                                 | __ / __ / ____ |                             |         |                                |                            |
|                                                                 | __ / __ / ____ |                             |         |                                |                            |
|                                                                 | __ / __ / ____ |                             |         |                                |                            |
|                                                                 | __ / __ / ____ |                             |         |                                |                            |

### Observance du traitement antirétroviral durant les 14 derniers jours:

| Libellés                                                                    | Oui | Non |
|-----------------------------------------------------------------------------|-----|-----|
| Avez-vous eu a sauté la prise de médicaments durant ces 14 derniers jours ? |     |     |
