# Supplementary material for: Immuno-virological response and associated factors amongst HIV-1 vertically infected adolescents in Yaoundé-Cameroon
Source: PubMed Central journal article supplement (PMC5675438; doi:10.1371/journal.pone.0187566), 2017-11-07
Supplement: pone.0187566.s002.pdf [file pone.0187566.s002.pdf]

S2 table -title : Data set of CD4 cell and viral measures in adolescents on antiretroviral therapy , Cameroon).

| DICO_ID | AGE | SEX    | Parental Survival | Weight | Height | Year of ART Start | AGE AT START in years | Story of Change in protocol | Year of protocol change | Number of Viral load measures | Current viral load | ABSOLUTE CD4 CELL COUNT | PERMANENT VIRAL SUPPRESSION | viral resupresion | Missing doses of ART |
|---------|-----|--------|-------------------|--------|--------|-------------------|-----------------------|-----------------------------|-------------------------|-------------------------------|--------------------|-------------------------|-----------------------------|-------------------|----------------------|
| 1       | 12  | male   | 2                 | 36     | 146    | 2011              | 7                     | 2 NA                        |                         | 2                             | 0                  | 693                     | 1                           | 2                 | 1                    |
| 2       | 16  | male   | 1                 | 62     | 176    | 2005              | 4                     | 2 NA                        |                         | 10                            | 0                  | 900                     | 2                           | 1                 | 1                    |
| 3       | 12  | Female | 2                 | 38     | 149    | 2005              | 1                     | 2 NA                        |                         | 3                             | 0                  | 1404                    | 1                           | 2                 | 1                    |
| 4       | 12  | male   | 4                 | 38     | 142    | 2007              | 3                     | 2 NA                        |                         | 10                            | 0                  | 1141                    | 1                           | 2                 | 2                    |
| 5       | 11  | male   | 2                 | 28     | 132    | 2011              | 6                     | 2 NA                        |                         | 2                             | 0                  | 1043                    | 2                           | 1                 | 1                    |
| 6       | 10  | Female | 2                 | 42     | 158    | 2009              | 3                     | 2 NA                        |                         | 7                             | 5302               | 844                     | 2                           | 1                 | 1                    |
| 7       | 11  | Female | 4                 | 25     | 132    | 2013              | 8                     | 2 NA                        |                         | 0 NA                          |                    | 576                     | 1                           | 2                 | 2                    |
| 8       | 12  | Female | 1                 | 31     | 137    | 2004              | 0                     | 2 NA                        |                         | 6                             | 0                  | 806                     | 1                           | 2                 | 2                    |
| 9       | 11  | male   | 4                 | 33     | 142    | 2005              | 0                     | 1                           | 2008                    | 11                            | 0                  | 1180                    | 2                           | 1                 | 1                    |
| 10      | 12  | male   | 2                 | 32     | 134    | 2014              | 10                    | 2 NA                        |                         | 6                             | 0                  | 1155                    | 1                           | 2                 | 2                    |
| 11      | 11  | male   | 1                 | 39     | 136    | 2008              | 3                     | 2 NA                        |                         | 4                             | 0                  | 1254                    | 2                           | 1                 | 1                    |
| 12      | 11  | male   | 4                 | 26     | 133    | 2006              | 2                     | 2 NA                        |                         | 7                             | 213                | 1254                    | 2                           | 1                 | 1                    |
| 13      | 17  | Female | 3                 | 44     | 147    | 2009              | 10                    | 2 NA                        |                         | 6                             | 0                  | 998                     | 2                           | 1                 | 1                    |
| 14      | 13  | Female | 4                 | 43     | 151    | 2008              | 5                     | 2 NA                        |                         | 7                             | 0                  | 1216                    | 1                           | 2                 | 1                    |
| 15      | 10  | Female | 2                 | 35     | 127    | 2007              | 0                     | 2 NA                        |                         | 5                             | 0                  | 2134                    | 1                           | 2                 | 1                    |
| 16      | 17  | male   | 2                 | 49     | 146    | 2009              | 10                    | 1                           | 2013                    | 5                             | 427                | 958                     | 2                           | 1                 | 1                    |
| 17      | 19  | male   | 3                 | 42     | 150    | 2006              | 9                     | 2 NA                        |                         | 9                             | 0                  | 817                     | 2                           | 1                 | 1                    |
| 18      | 13  | Female | 4                 | 56     | 145    | 2011              | 8                     | 2 NA                        |                         | 4                             | 0                  | 632                     | 1                           | 2                 | 2                    |
| 19      | 11  | Female | 4                 | 28     | 134    | 2011              | 6                     | 2 NA                        |                         | 4                             | 0                  | 1932                    | 1                           | 2                 | 2                    |
| 20      | 12  | Female | 1                 | 39     | 140    | 2009              | 5                     | 2 NA                        |                         | 3                             | 0                  | 1862                    | 1                           | 2                 | 1                    |
| 21      | 10  | Female | 2                 | 25     | 125    | 2014              | 8                     | 2 NA                        |                         | 1                             | 30123              | 134                     | 2                           | 1                 | 1                    |
| 22      | 14  | Female | 2                 | 41     | 142    | 2006              | 4                     | 1                           | 2009                    | 9                             | 59512              | 412                     | 2                           | 1                 | 2                    |
| 23      | 13  | Female | 2                 | 27     | 132    | 2012              | 9                     | 2 NA                        |                         | 2                             | 0                  | 1192                    | 1                           | 2                 | 2                    |
| 24      | 15  | Female | 4                 | 55     | 156    | 2009              | 8                     | 2 NA                        |                         | 6                             | 0                  | 680                     | 2                           | 1                 | 1                    |
| 25      | 14  | Female | 2                 | 45     | 154    | 2004              | 0                     | 1                           | 2009                    | 10                            | 0                  | 628                     | 2                           | 1                 | 1                    |

|    |           |   |    |     |      |    |        |    |        |      |   |   |   |
|----|-----------|---|----|-----|------|----|--------|----|--------|------|---|---|---|
| 26 | 11 male   | 2 | 30 | 135 | 2011 | 6  | 2 NA   | 3  | 90360  | 1012 | 2 | 1 | 1 |
| 27 | 16 Female | 4 | 61 | 160 | 2009 | 9  | 2 NA   | 7  | 0      | 948  | 1 | 2 | 2 |
| 28 | 16 male   | 2 | 41 | 151 | 2013 | 13 | 2 NA   | 4  | 0      | 1178 | 1 | 2 | 1 |
| 29 | 13 Female | 4 | 42 | 146 | 2013 | 10 | 2 NA   | 1  | 0      | 587  | 1 | 2 | 2 |
| 30 | 13 Female | 4 | 41 | 147 | 2011 | 8  | 2 NA   | 4  | 0      | 898  | 1 | 2 | 1 |
| 31 | 14 Female | 4 | 36 | 140 | 2004 | 2  | 2 NA   | 7  | 0      | 628  | 1 | 2 | 2 |
| 32 | 15 male   | 4 | 44 | 158 | 2011 | 10 | 2 NA   | 9  | 0      | 978  | 1 | 2 | 2 |
| 33 | 17 Female | 4 | 50 | 143 | 2003 | 5  | 1 2009 | 12 | 0      | 987  | 2 | 1 | 1 |
| 34 | 18 male   | 4 | 62 | 164 | 2006 | 8  | 2 NA   | 12 | 0      | 634  | 2 | 1 | 2 |
| 35 | 12 male   | 4 | 40 | 150 | 2003 | 0  | 2 NA   | 7  | 0      | 1287 | 1 | 2 | 1 |
| 36 | 15 male   | 1 | 52 | 168 | 2005 | 4  | 2 NA   | 11 | 0      | 490  | 1 | 2 | 1 |
| 37 | 15 male   | 4 | 56 | 169 | 2004 | 3  | 2 NA   | 6  | 0      | 1148 | 1 | 2 | 1 |
| 38 | 11 male   | 4 | 38 | 135 | 2005 | 0  | 2 NA   | 7  | 0      | 859  | 1 | 2 | 2 |
| 39 | 15 male   | 4 | 47 | 151 | 2006 | 5  | 1 2007 | 6  | 8942   | 461  | 2 | 1 | 1 |
| 40 | 13 Female | 2 | 45 | 151 | 2010 | 7  | 2 NA   | 3  | 3000   | 524  | 2 | 1 | 1 |
| 41 | 13 male   | 4 | 46 | 150 | 2008 | 8  | 2 NA   | 10 | 0      | 669  | 2 | 1 | 1 |
| 42 | 16 male   | 1 | 55 | 172 | 2004 | 4  | 1 2009 | 12 | 138556 | 422  | 2 | 1 | 1 |
| 43 | 11 Female | 4 | 57 | 144 | 2005 | 0  | 2 NA   | 8  | 0      | 896  | 1 | 2 | 2 |
| 44 | 17 Female | 4 | 35 | 128 | 2014 | 15 | 2 NA   | 3  | 93274  | 500  | 2 | 1 | 2 |
| 45 | 14 male   | 4 | 32 | 139 | 2011 | 9  | 2 NA   | 1  | 5648   | 553  | 2 | 1 | 2 |
| 46 | 14 male   | 4 | 33 | 136 | 2007 | 5  | 1 2009 | 4  | 0      | 1086 | 2 | 1 | 1 |
| 47 | 12 Female | 1 | 40 | 147 | 2014 | 9  | 2 NA   | 2  | 0      | 470  | 1 | 2 | 2 |
| 48 | 14 Female | 2 | 34 | 141 | 2007 | 5  | 2 NA   | 3  | 0      | 462  | 2 | 1 | 1 |
| 49 | 17 Female | 3 | 59 | 152 | 2014 | 15 | 2 NA   | 1  | 302    | 353  | 2 | 1 | 1 |
| 50 | 15 male   | 2 | 48 | 160 | 2011 | 11 | 2 NA   | 5  | 0      | 457  | 2 | 1 | 1 |
| 51 | 13 male   | 4 | 44 | 154 | 2009 | 6  | 2 NA   | 4  | 0      | 1176 | 2 | 1 | 2 |
| 52 | 16 Female | 4 | 54 | 148 | 2010 | 10 | 2 NA   | 3  | 1062   | 867  | 2 | 1 | 1 |
| 53 | 12 Female | 4 | 45 | 149 | 2009 | 5  | 2 NA   | 3  | 0      | 1248 | 1 | 2 | 1 |
| 54 | 11 Female | 2 | 23 | 138 | 2012 | 7  | 2 NA   | 3  | 0      | 896  | 1 | 2 | 2 |
| 55 | 13 male   | 4 | 41 | 138 | 2011 | 8  | 2 NA   | 4  | 0      | 714  | 1 | 2 | 1 |
| 56 | 10 Female | 3 | 28 | 122 | 2015 | 9  | 2 NA   | 2  | 0      | 488  | 1 | 2 | 2 |
| 57 | 15 male   | 1 | 51 | 162 | 2004 | 3  | 2 NA   | 7  | 0      | 941  | 1 | 2 | 1 |
| 58 | 11 Female | 4 | 36 | 131 | 2014 | 8  | 2 NA   | 2  | 1140   | 462  | 2 | 1 | 1 |

|    |           |   |    |     |      |    |      |      |    |        |      |   |   |   |
|----|-----------|---|----|-----|------|----|------|------|----|--------|------|---|---|---|
| 59 | 12 Female | 4 | 33 | 138 | 2008 | 4  | 1    | 2010 | 10 | 78     | 669  | 2 | 1 | 1 |
| 60 | 19 Female | 3 | 54 | 142 | 2015 | 18 | 2 NA |      | 2  | 134    | 669  | 1 | 2 | 2 |
| 61 | 15 Female | 4 | 48 | 154 | 2008 | 7  | 2 NA |      | 10 | 0      | 1192 | 1 | 2 | 1 |
| 62 | 13 Female | 4 | 30 | 152 | 2012 | 9  | 2 NA |      | 2  | 0      | 1302 | 1 | 2 | 2 |
| 63 | 16 male   | 3 | 50 | 148 | 2007 | 7  | 1    | 2008 | 8  | 0      | 709  | 2 | 1 | 1 |
| 64 | 10 Female | 4 | 31 | 124 | 2013 | 7  | 2 NA |      | 2  | 0      | 645  | 1 | 2 | 1 |
| 65 | 11 Female | 4 | 27 | 130 | 2013 | 8  | 2 NA |      | 2  | 0      | 967  | 1 | 2 | 1 |
| 66 | 13 Female | 4 | 34 | 140 | 2013 | 10 | 2 NA |      | 2  | 0      | 552  | 1 | 2 | 1 |
| 67 | 12 Female | 4 | 26 | 132 | 2009 | 5  | 1    | 2014 | 2  | 0      | 515  | 2 | 1 | 1 |
| 68 | 13 Female | 4 | 39 | 142 | 2014 | 11 | 2 NA |      | 2  | 0      | 905  | 1 | 2 | 2 |
| 69 | 13 male   | 1 | 39 | 122 | 2010 | 7  | 2 NA |      | 4  | 0      | 1525 | 1 | 2 | 1 |
| 70 | 12 male   | 2 | 26 | 135 | 2015 | 11 | 2 NA |      | 1  | 651418 | 46   | 1 | 2 | 2 |
| 71 | 14 Female | 4 | 47 | 140 | 2002 | 0  | 1    | 2008 | 12 | 0      | 1342 | 2 | 1 | 1 |
| 72 | 16 male   | 3 | 46 | 154 | 2015 | 15 | 2 NA |      | 1  | 5148   | 306  | 1 | 2 | 1 |
| 73 | 18 male   | 4 | 66 | 168 | 2009 | 11 | 1    | 2011 | 12 | 0      | 908  | 2 | 1 | 1 |
| 74 | 18 Female | 4 | 50 | 153 | 2012 | 14 | 2 NA |      | 4  | 0      | 1175 | 1 | 2 | 2 |
| 75 | 13 Female | 4 | 33 | 145 | 2010 | 7  | 2 NA |      | 8  | 0      | 984  | 1 | 2 | 1 |
| 76 | 11 Female | 3 | 36 | 140 | 2011 | 6  | 2 NA |      | 3  | 248    | 883  | 2 | 1 | 1 |
| 77 | 14 male   | 1 | 36 | 145 | 2011 | 9  | 2 NA |      | 2  | 0      | 763  | 1 | 2 | 1 |
| 78 | 12 male   | 4 | 30 | 137 | 2008 | 4  | 2 NA |      | 6  | 0      | 911  | 1 | 2 | 1 |
| 79 | 14 male   | 4 | 48 | 142 | 2009 | 7  | 2 NA |      | 4  | 0      | 480  | 1 | 2 | 1 |
| 80 | 17 male   | 3 | 56 | 158 | 2010 | 11 | 2 NA |      | 5  | 27699  | 579  | 2 | 1 | 1 |
| 81 | 14 male   | 3 | 32 | 135 | 2004 | 2  | 1    | 2009 | 11 | 0      | 656  | 2 | 1 | 2 |
| 82 | 13 Female | 1 | 29 | 130 | 2009 | 5  | 2 NA |      | 5  | 546    | 965  | 2 | 1 | 2 |
| 83 | 17 Female | 3 | 55 | 157 | 2014 | 15 | 2 NA |      | 3  | 26590  | 193  | 2 | 1 | 2 |
| 84 | 10 male   | 4 | 36 | 128 | 2007 | 1  | 2 NA |      | 8  | 0      | 1117 | 1 | 2 | 1 |
| 85 | 17 male   | 3 | 43 | 161 | 2009 | 10 | 2 NA |      | 6  | 0      | 1012 | 1 | 2 | 2 |
| 86 | 15 male   | 1 | 33 | 137 | 2007 | 6  | 2 NA |      | 8  | 352    | 368  | 2 | 1 | 1 |
| 87 | 17 Female | 3 | 68 | 165 | 2000 | 1  | 2 NA |      | 9  | 143    | 786  | 2 | 1 | 1 |
| 88 | 17 Female | 3 | 40 | 152 | 2012 | 13 | 2 NA |      | 2  | 0      | 821  | 1 | 2 | 2 |
| 89 | 11 Female | 3 | 30 | 136 | 2011 | 6  | 2 NA |      | 3  | 0      | 976  | 1 | 2 | 2 |
| 90 | 17 Female | 3 | 63 | 160 | 2001 | 3  | 2 NA |      | 8  | 4855   | 621  | 2 | 1 | 1 |
| 91 | 11 male   | 3 | 32 | 141 | 2006 | 1  | 2 NA |      | 6  | 0      | 864  | 1 | 2 | 2 |

|     |           |   |    |     |      |    |        |    |        |      |   |   |   |
|-----|-----------|---|----|-----|------|----|--------|----|--------|------|---|---|---|
| 92  | 11 male   | 4 | 32 | 151 | 2009 | 4  | 2 NA   | 4  | 0      | 1140 | 1 | 2 | 2 |
| 93  | 10 Female | 4 | 21 | 117 | 2012 | 6  | 2 NA   | 7  | 0      | 1900 | 1 | 2 | 1 |
| 94  | 10 Female | 3 | 26 | 117 | 2008 | 2  | 2 NA   | 5  | 0      | 1086 | 1 | 2 | 1 |
| 95  | 13 Female | 4 | 34 | 143 | 2009 | 6  | 1 2014 | 4  | 0      | 857  | 2 | 1 | 1 |
| 96  | 14 Female | 4 | 47 | 156 | 2011 | 9  | 2 NA   | 5  | 0      | 746  | 1 | 2 | 1 |
| 97  | 11 male   | 2 | 25 | 123 | 2011 | 6  | 2 NA   | 2  | 90360  | 1012 | 2 | 1 | 2 |
| 98  | 12 Female | 4 | 32 | 147 | 2011 | 7  | 1 2013 | 3  | 0      | 549  | 2 | 1 | 2 |
| 99  | 19 male   | 3 | 64 | 178 | 2003 | 6  | 1 2015 | 12 | 350962 | 456  | 2 | 1 | 2 |
| 100 | 11 Female | 2 | 38 | 132 | 2009 | 4  | 2 NA   | 5  | 0      | 1649 | 1 | 2 | 2 |
| 101 | 16 male   | 4 | 44 | 156 | 2003 | 3  | 1 2004 | 12 | 0      | 1692 | 2 | 1 | 1 |
| 102 | 16 male   | 2 | 46 | 162 | 2007 | 7  | 2 NA   | 9  | 13614  | 12   | 2 | 1 | 1 |
| 103 | 16 Female | 4 | 51 | 144 | 2005 | 5  | 2 NA   | 6  | 0      | 776  | 2 | 1 | 2 |
| 104 | 15 Female | 1 | 40 | 150 | 2007 | 6  | 2 NA   | 4  | 5489   | 322  | 2 | 1 | 1 |
| 105 | 19 male   | 3 | 61 | 172 | 2004 | 7  | 2 NA   | 12 | 33956  | 441  | 2 | 1 | 2 |
| 106 | 13 male   | 1 | 33 | 140 | 2009 | 6  | 2 NA   | 3  | 1218   | 435  | 2 | 1 | 1 |
| 107 | 18 male   | 4 | 50 | 164 | 2009 | 11 | 2 NA   | 3  | 0      | 904  | 2 | 1 | 1 |
| 108 | 18 Female | 2 | 56 | 163 | 2008 | 10 | 2 NA   | 7  | 0      | 1103 | 2 | 1 | 1 |
| 109 | 11 male   | 4 | 44 | 156 | 2005 | 0  | 2 NA   | 12 | 708    | 879  | 2 | 1 | 2 |
| 110 | 15 Female | 3 | 36 | 152 | 2014 | 13 | 2 NA   | 2  | 28778  | 309  | 1 | 2 | 1 |
| 111 | 16 male   | 4 | 58 | 171 | 2006 | 6  | 2 NA   | 5  | 0      | 1117 | 1 | 2 | 1 |
| 112 | 11 male   | 4 | 25 | 115 | 2015 | 10 | 2 NA   | 2  | 0      | 432  | 1 | 2 | 2 |
| 113 | 10 Female | 2 | 26 | 123 | 2013 | 7  | 2 NA   | 2  | 0      | 989  | 1 | 2 | 2 |
| 114 | 10 male   | 4 | 23 | 129 | 2007 | 1  | 2 NA   | 6  | 3992   | 443  | 2 | 1 | 2 |
| 115 | 16 male   | 4 | 43 | 148 | 2013 | 13 | 2 NA   | 3  | 202000 | 10   | 2 | 1 | 1 |
| 116 | 12 Female | 4 | 42 | 146 | 2004 | 0  | 2 NA   | 8  | 0      | 1084 | 1 | 2 | 1 |
| 117 | 15 Female | 1 | 45 | 156 | 2007 | 6  | 2 NA   | 10 | 0      | 563  | 1 | 2 | 2 |
| 118 | 15 Female | 1 | 39 | 147 | 2008 | 7  | 2 NA   | 6  | 131    | 546  | 2 | 1 | 1 |
| 119 | 15 male   | 2 | 48 | 159 | 2009 | 8  | 2 NA   | 5  | 0      | 1069 | 1 | 2 | 2 |
| 120 | 11 Female | 4 | 31 | 148 | 2014 | 9  | 2 NA   | 2  | 2049   | 368  | 2 | 1 | 1 |
| 121 | 12 male   | 2 | 31 | 141 | 2009 | 5  | 2 NA   | 5  | 0      | 886  | 1 | 2 | 2 |
| 122 | 10 male   | 4 | 27 | 130 | 2009 | 3  | 2 NA   | 8  | 0      | 991  | 1 | 2 | 1 |
| 123 | 13 male   | 4 | 34 | 141 | 2010 | 7  | 2 NA   | 3  | 0      | 516  | 2 | 1 | 1 |
| 124 | 10 Female | 2 | 31 | 132 | 2009 | 4  | 2 NA   | 6  | 0      | 608  | 1 | 2 | 1 |

|     |           |   |    |     |      |    |        |    |        |      |   |   |   |
|-----|-----------|---|----|-----|------|----|--------|----|--------|------|---|---|---|
| 125 | 17 Female | 4 | 76 | 171 | 2015 | 16 | 2 NA   | 2  | 0      | 577  | 1 | 2 | 1 |
| 126 | 16 male   | 4 | 50 | 162 | 2008 | 8  | 2 NA   | 3  | 0      | 865  | 1 | 2 | 1 |
| 127 | 16 male   | 4 | 37 | 148 | 2004 | 4  | 2 NA   | 7  | 30244  | 183  | 2 | 1 | 1 |
| 128 | 16 male   | 4 | 41 | 156 | 2009 | 9  | 2 NA   | 8  | 480333 | 406  | 2 | 1 | 2 |
| 129 | 16 male   | 4 | 50 | 156 | 2010 | 10 | 2 NA   | 6  | 0      | 715  | 1 | 2 | 1 |
| 130 | 16 Female | 4 | 45 | 149 | 2006 | 6  | 2 NA   | 6  | 0      | 1179 | 2 | 1 | 1 |
| 131 | 18 Female | 3 | 48 | 151 | 2006 | 8  | 2 NA   | 5  | 0      | 1171 | 2 | 1 | 2 |
| 132 | 14 male   | 2 | 33 | 143 | 2013 | 11 | 2 NA   | 4  | 12375  | 475  | 2 | 1 | 1 |
| 133 | 16 Female | 4 | 55 | 171 | 2006 | 3  | 1 2007 | 6  | 0      | 595  | 2 | 1 | 1 |
| 134 | 18 male   | 1 | 54 | 172 | 2014 | 16 | 2 NA   | 2  | 0      | 976  | 1 | 2 | 1 |
| 135 | 10 Female | 4 | 20 | 122 | 2007 | 1  | 2 NA   | 4  | 0      | 1524 | 1 | 2 | 1 |
| 136 | 11 Female | 4 | 33 | 143 | 2007 | 2  | 2 NA   | 3  | 0      | 1024 | 1 | 2 | 1 |
| 137 | 17 Female | 4 | 52 | 168 | 2006 | 7  | 2 NA   | 6  | 0      | 1175 | 1 | 2 | 2 |
| 138 | 15 Female | 3 | 54 | 149 | 2011 | 11 | 2 NA   | 3  | 176360 | 41   | 2 | 1 | 1 |
| 139 | 17 male   | 4 | 46 | 166 | 2004 | 5  | 2 NA   | 9  | 0      | 868  | 1 | 2 | 1 |
| 140 | 11 male   | 4 | 28 | 130 | 2007 | 2  | 2 NA   | 4  | 0      | 984  | 1 | 2 | 2 |
| 141 | 12 male   | 4 | 44 | 152 | 2004 | 0  | 1 2007 | 11 | 0      | 785  | 2 | 1 | 1 |
| 142 | 10 male   | 4 | 24 | 120 | 2007 | 1  | 2 NA   | 7  | 0      | 1154 | 1 | 2 | 1 |
| 143 | 18 Female | 3 | 52 | 150 | 2014 | 17 | 2 NA   | 2  | 177    | 565  | 1 | 2 | 2 |
| 144 | 15 male   | 3 | 32 | 152 | 2007 | 6  | 2 NA   | 4  | 0      | 817  | 2 | 1 | 1 |
| 145 | 11 male   | 3 | 29 | 126 | 2012 | 7  | 2 NA   | 2  | 0      | 1442 | 1 | 2 | 2 |
